# Supplementary material for: A ratiometric nanoprobe for the in vivo bioimaging of hypochlorous acid to detect drug-damaged liver and kidneys
Source: Royal Society of Chemistry journal article supplement (doi:10.1039/d2an01977a), 2023-01-01
Supplement: d2an01977a1.pdf [file d2an01977a1.pdf]

## Supporting Information

### **A ratiometric nanoprobe for *in vivo* bioimaging of hypochlorous acid to detect drug-damaged liver and kidney**

Lina Shangguan<sup>ab‡</sup>, Xiaoli Qian<sup>b‡</sup>, Zhuoyang Wu<sup>b</sup>, Tingting Han<sup>b</sup>, Wanlu Sun<sup>b</sup>, Li Liu<sup>a\*</sup>, Yi Liu<sup>b\*</sup>

<sup>a</sup> *Clinical Laboratory, Xiantao First People's Hospital, Xiantao, 433000, China.*

<sup>b</sup> *School of Engineering, China Pharmaceutical University, Nanjing, 211198, China*

<sup>‡</sup>*These authors contributed equally.*

*\*Correspondence Author: Li Liu ([liuli97892022@163.com](mailto:liuli97892022@163.com)); Yi Liu ([yiliu@cpu.edu.cn](mailto:yiliu@cpu.edu.cn))*

## Table of contents

|                                       |      |
|---------------------------------------|------|
| 1. Materials and apparatus.....       | S-3  |
| 2. Table S1.....                      | S-4  |
| 3. Synthesis of compound NRH-800..... | S-5  |
| 4. Fig. S1.....                       | S-6  |
| 5. Fig. S2.....                       | S-6  |
| 6. Fig. S3.....                       | S-7  |
| 7. Fig. S4.....                       | S-7  |
| 8. Fig. S5.....                       | S-8  |
| 9. Fig. S6.....                       | S-8  |
| 10. Fig. S7.....                      | S-9  |
| 11. Fig. S8.....                      | S-9  |
| 12. Fig. S9.....                      | S-9  |
| 13. Fig. S10.....                     | S-10 |
| 14. Fig. S11.....                     | S-10 |
| 15. Fig. S12.....                     | S-11 |
| 16. Fig. S13.....                     | S-11 |
| 17. Fig. S14.....                     | S-12 |
| 18. Fig. S15.....                     | S-12 |
| 19. Fig. S16.....                     | S-12 |
| 20. Fig. S17.....                     | S-13 |
| 21. REFERENCE.....                    | S-13 |

**Materials and apparatus.**

Deionized water was used to prepare all aqueous solutions. 2,3,3-Trimethylindolenine and 2-(4-Diethylamino-2-hydroxybenzoyl)benzoic acid were purchased from J&K. Malondialdehyde bis(phenylimine) monohydrochloride was purchased from Alfa Aesar (USA). Sodium Hypochlorite Pentahydrate was purchased from TCI. Other materials were purchased from Shanghai Aladdin Bio-Chem Technology Co. The confocal fluorescence images of the cells were determined with confocal laser scanning microscope (CLSM, LSM800, Zeiss, Germany) and the fluorescence images of the mice were determined with CCD from princeton instruments. All NMR data were collected using a Bruker 400 MHz. Mass spectroscopy data were collected on Waters Q-TOF Micro<sup>TM</sup>. High Performance Liquid Chromatography data were collected on Thermo Scientific <sup>TM</sup> Dionex <sup>TM</sup> UltiMate 3000.

The cells used in the experiment were all from ATCC strain storage Center in the United States. BALB/c mice were bought from Nanjing GemPharmatech Co, Ltd.

**Table S1. Properties of previously reported ratiometric fluorescent probes for HClO.**

| Probes                                                                              | $E_x/E_m$<br>(nm) | Stokes<br>shift<br>(nm) | Response<br>time | Detection<br>limit | Applications<br>Cell & Mice            | Ref.         |
|-------------------------------------------------------------------------------------|-------------------|-------------------------|------------------|--------------------|----------------------------------------|--------------|
| 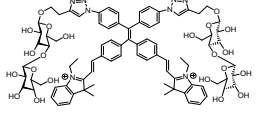   | 300/550-697       | 147                     | 10 min           | 75 nm              | HepG2 cells                            | [1]          |
|    | 440/500-605       | 105                     | 3 min            | 0.064 $\mu$ m      | HepG2 cells &<br>Zebrafish &<br>Tissue | [2]          |
|    | 440/520-640       | 120                     | -                | 17 nm              | RAW264.7 cells<br>& Zebrafish          | [3]          |
|    | 400/480-750       | 270                     | 10 s             | 22.6 nm            | HepG2 cells &<br>Mice                  | [4]          |
|   | 390/525-665       | 140                     | 7 s              | 0.28 $\mu$ m       | PC12 cells &<br>Zebrafish &<br>Mice    | [5]          |
|  | 740/550-610       | 60                      | 20 s             | 54 nm              | HeLa cells &<br>Mice                   | [6]          |
|  | 400/450-595       | 145                     | -                | 188 nm             | A549 or<br>RAW264.7 cells<br>& Tissue  | [7]          |
|  | 504/642-717       | 75                      | 5 min            | 16.1 nm            | Raw 264.7 &<br>Tissue                  | [8]          |
|  | 800/493-595       | 102                     | 150 s            | 55.4 nm            | BV-2 or HepG2<br>cells & Tissue        | [9]          |
|  | 370/495-570       | 75                      | -                | 0.84 $\mu$ m       | Hela cells &<br>Mice                   | [10]         |
|  | 442/495-845       | 350                     | 5 s              | 12 nm              | L02 or 239T<br>cells & Tissue          | This<br>work |

### Synthesis of compound NRH-800.

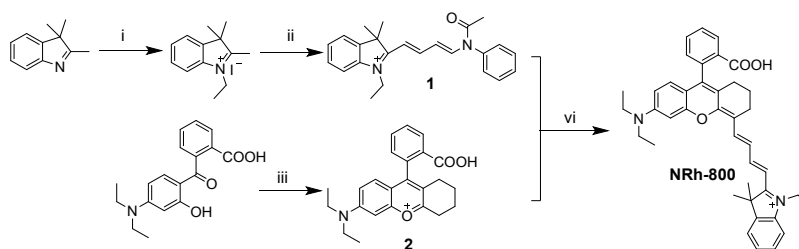

**Scheme S1.** Synthetic routine of NRH-800. Reagents and conditions: i) iodoethane, toluene, 110 °C; ii) malonaldehydebis(phenylimine)monohydrochloride, KOAc, Ac<sub>2</sub>O, 25 °C; iii) cyclohexanone, H<sub>2</sub>SO<sub>4</sub>, HClO<sub>4</sub>; vi) KOAc, Ac<sub>2</sub>O, 60 °C.

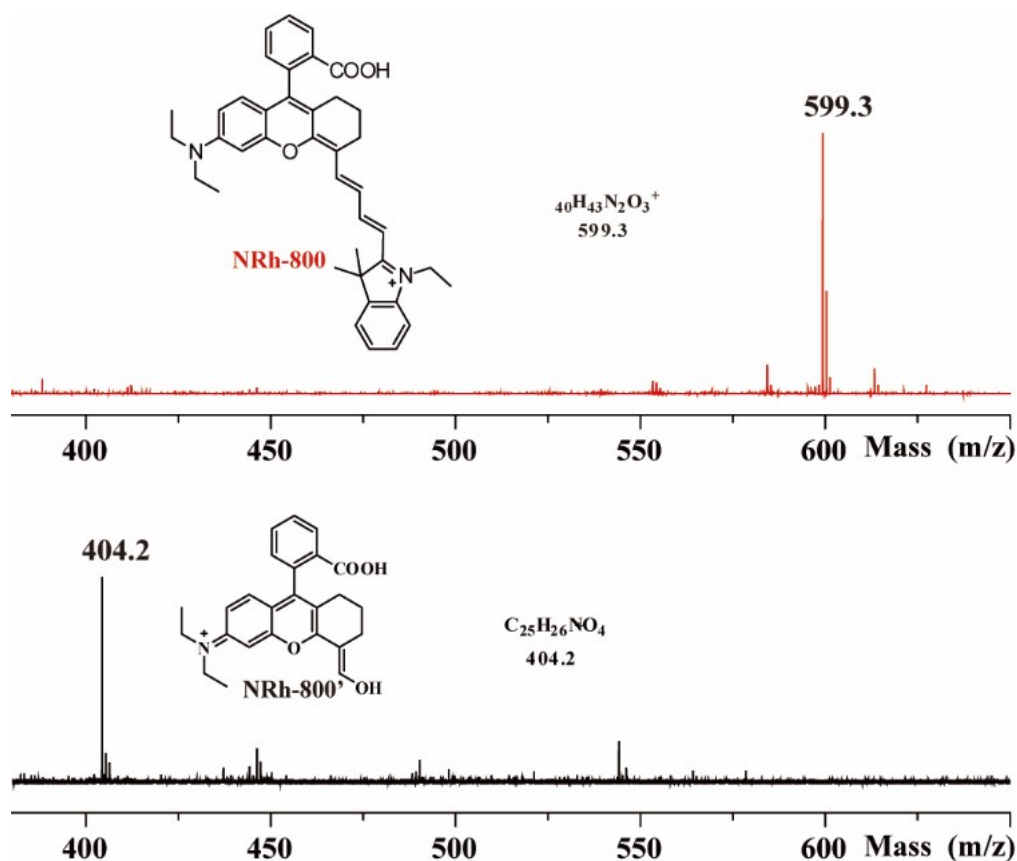

Figure S1. The changed in the MS spectra of NRH-800 before and after treated with HClO.

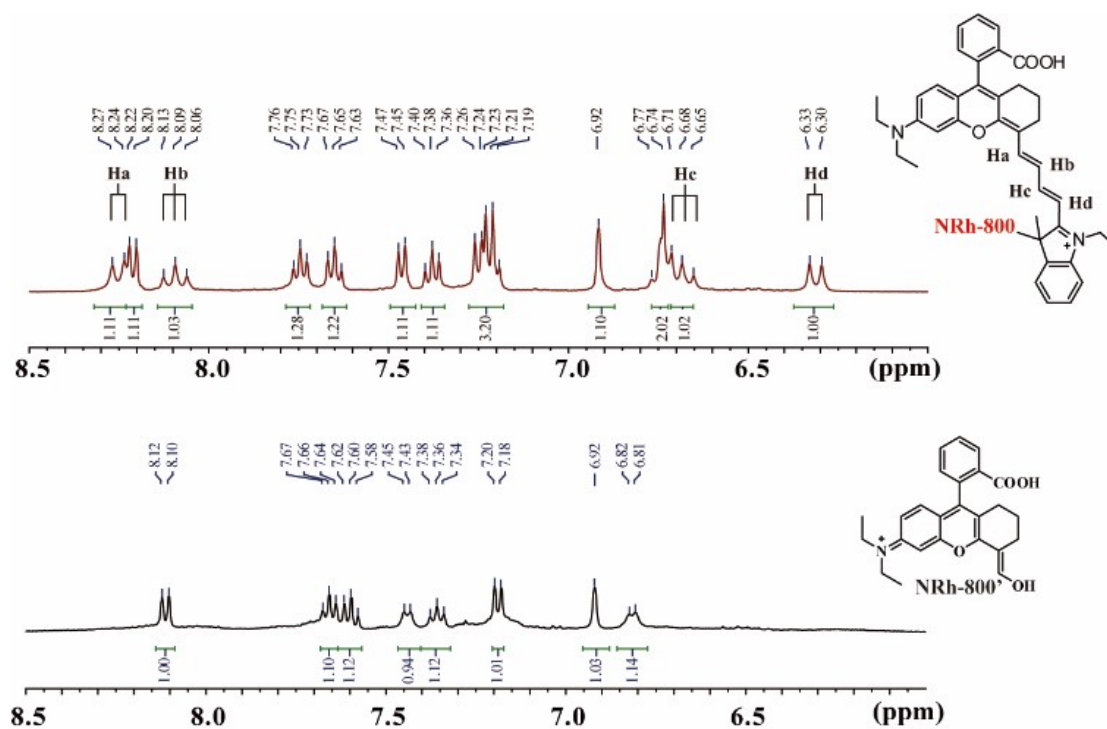

Figure S2. The changed in the  $^1\text{H}$  NMR spectra of NRH-800 before and after treated with HClO.

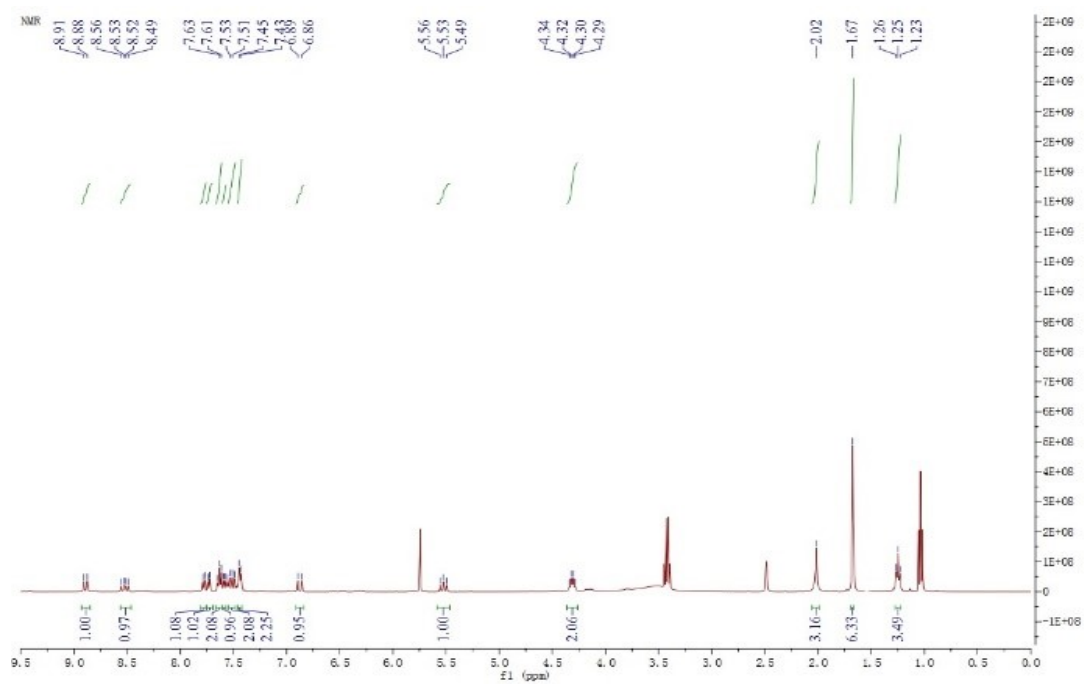

Figure S3. The  $^1\text{H}$  NMR spectra of the compound 1 ( $\text{d}_6$ -DMSO).

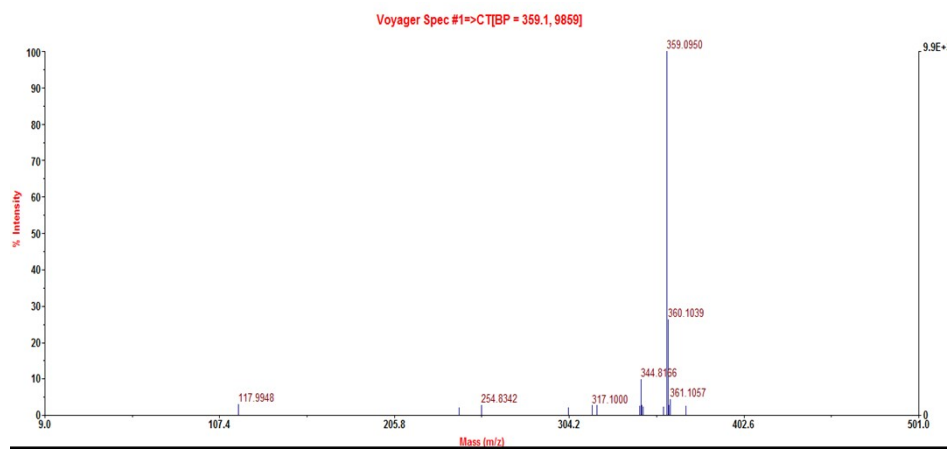

Figure S4. The MALDI-TOF MS of the compound 1.

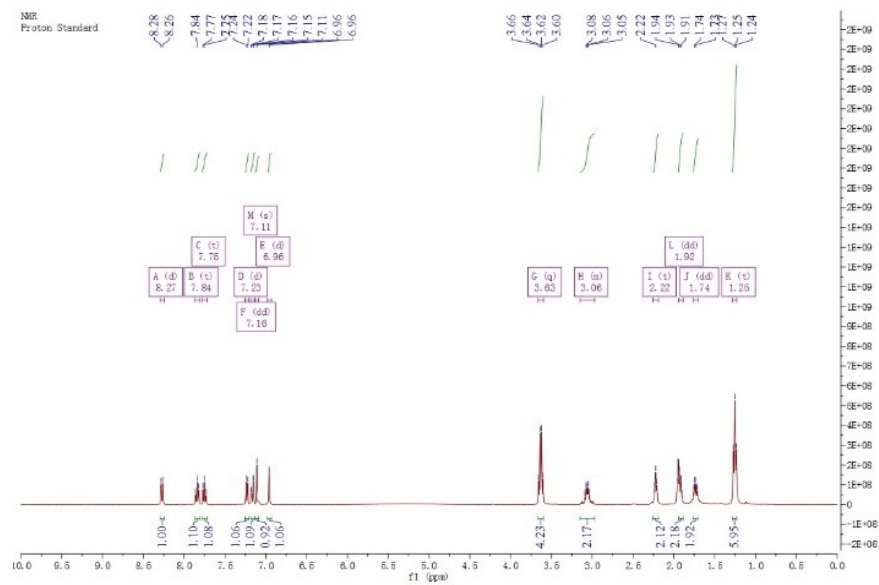

Figure S5. The  $^1\text{H}$  NMR spectra of the compound 2 ( $\text{CD}_3\text{CN}$ ).

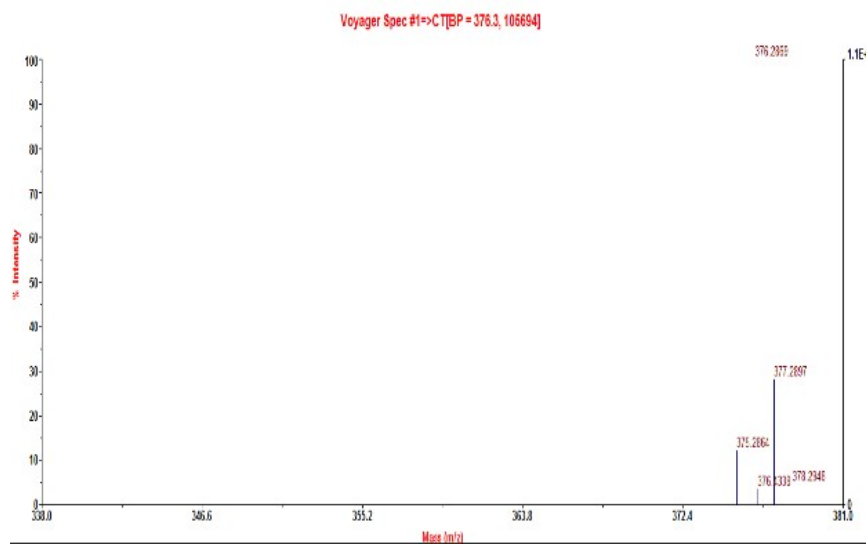

Figure S6. The MALDI-TOF-MS spectra of the compound 2.



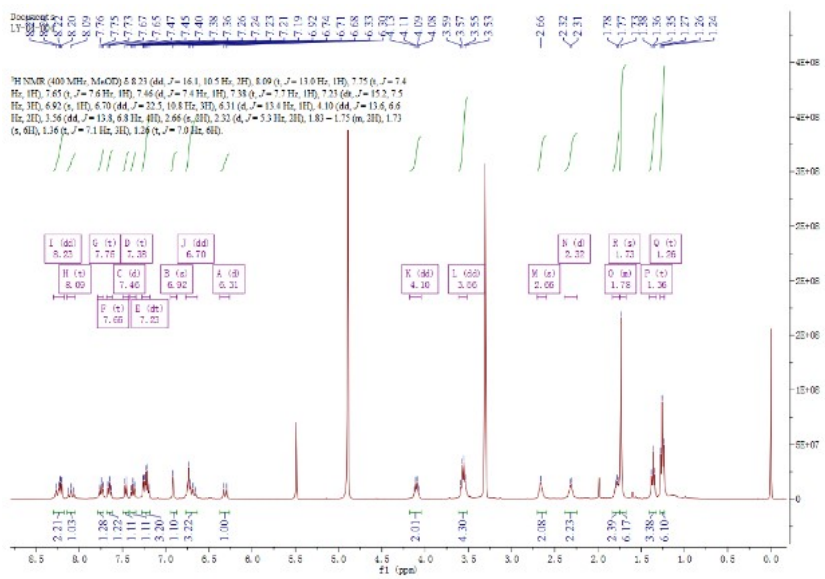

Figure S7. The <sup>1</sup>H NMR spectra of the compound NRh-800 (CD<sub>3</sub>OD).

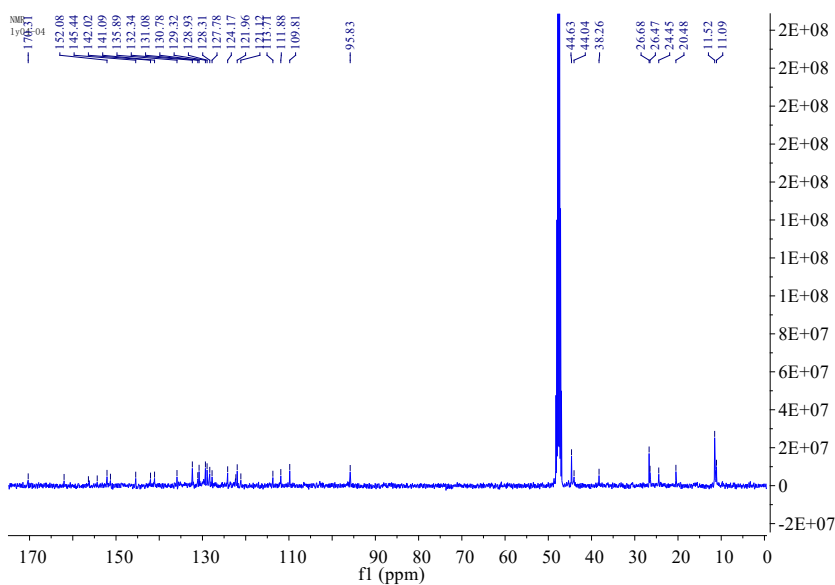

Figure S8. The <sup>13</sup>C NMR spectra of the compound NRH-800.

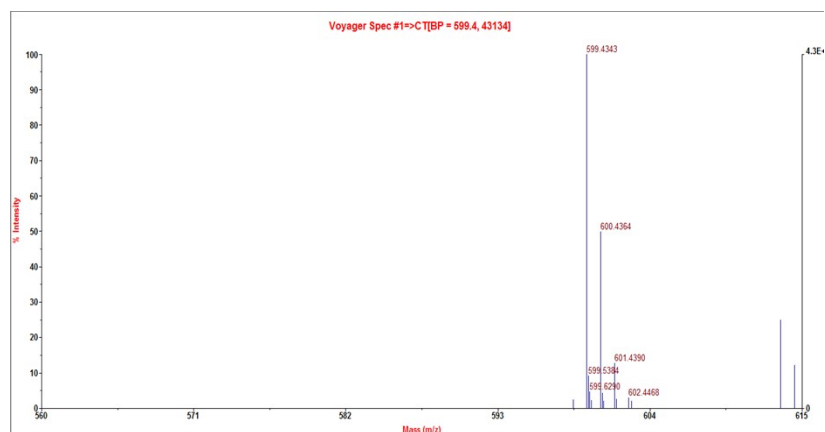

Figure S9. The MALDI-TOF-MS spectra of the compound NRH-800.

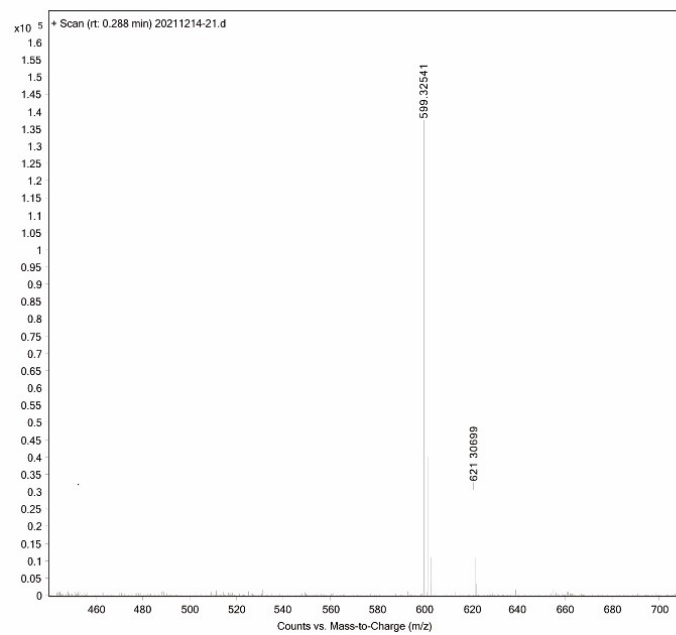

Figure S10. High resolution mass spectra of NRH-800.

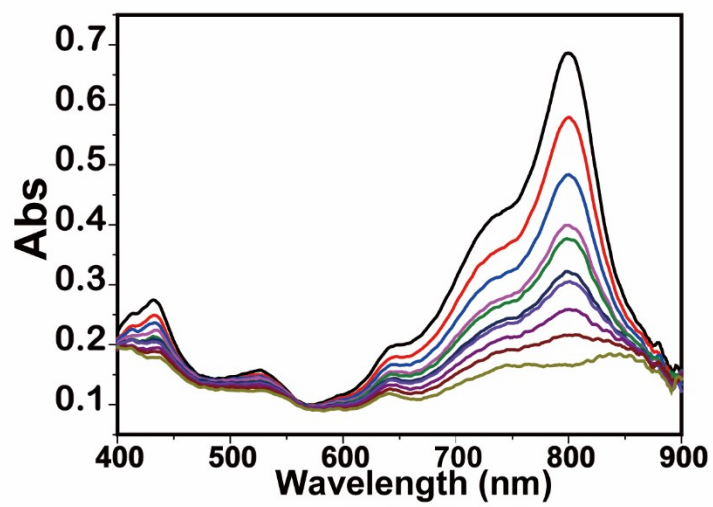

Figure S11. UV absorption of NRH-800 under HClO titration (0-15 eq).

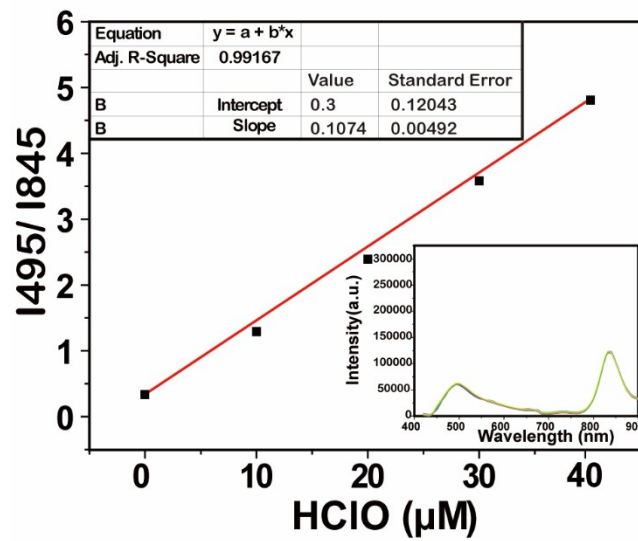

**Figure S12.** Fitted calibration curve for fluorescence value at 495 nm/845 nm with HClO concentration of 0-40  $\mu\text{M}$ .

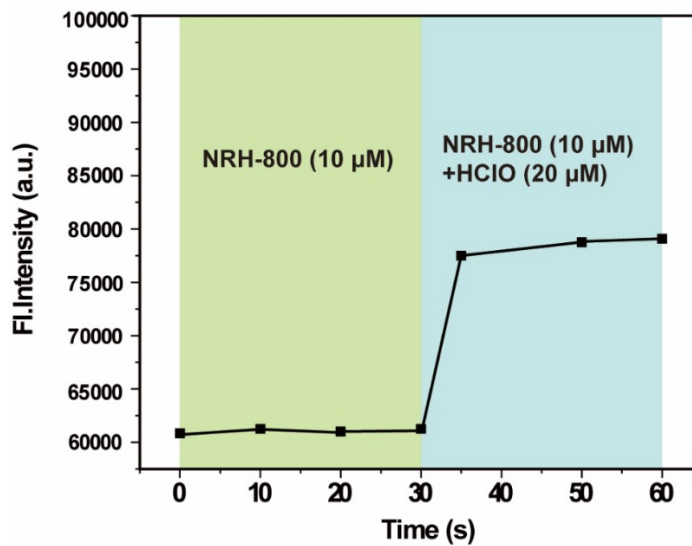

**Figure S13.** The reaction time of NRH-800 to HClO (20  $\mu\text{M}$ ). HClO is added at 30 s.

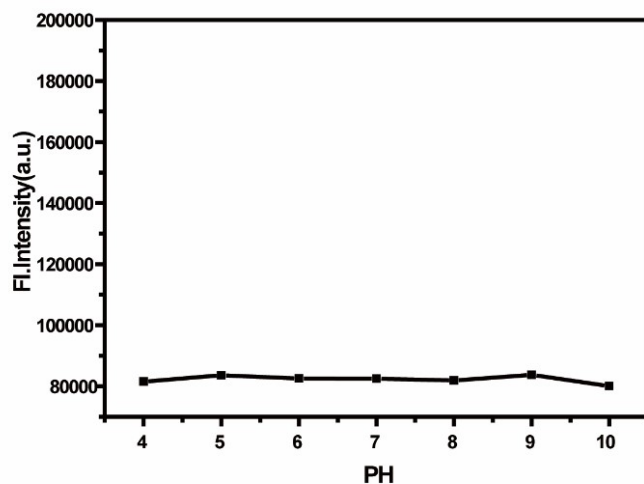

Figure S14. The pH stability of NRH-800.

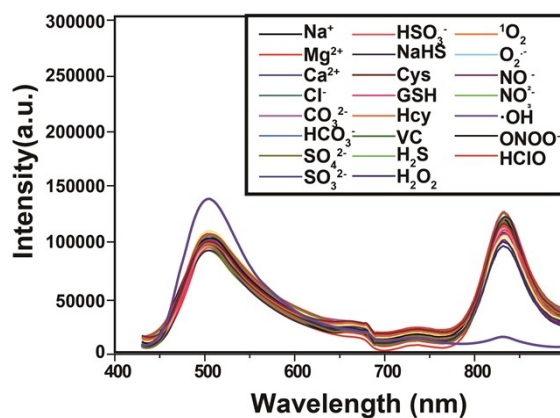

Figure S15. The fluorescence spectra of NRH-800 under presence of HClO (5 eq) and diverse analytes (5 eq).

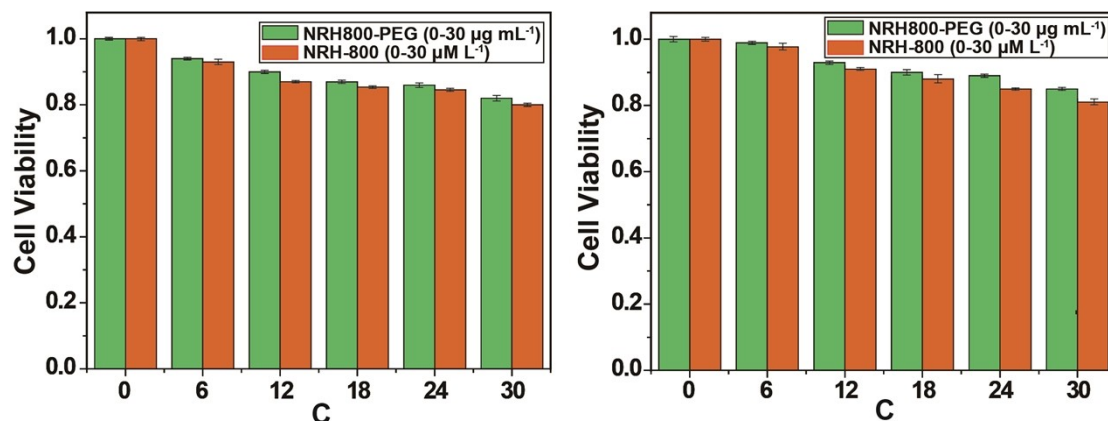

Figure S16. MTT assay for estimating cell viability (%) of L02 or 293T cells treated with various concentrations of NRH800-PEG (0-30 µg mL<sup>-1</sup>) and NRH-800 (0-25 µM L<sup>-1</sup>) after 24 h incubation.

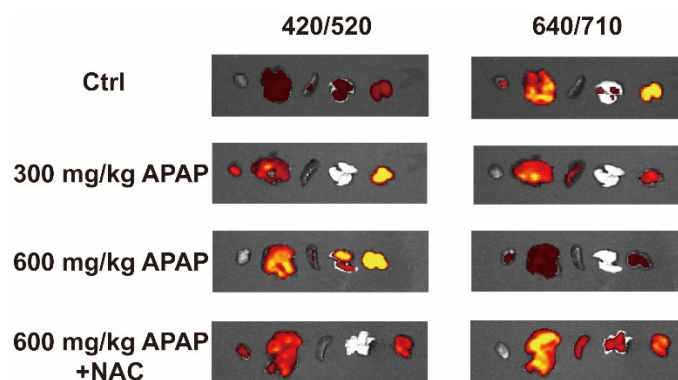

**Figure S17.** The bright field of fluorescence imaging of organs of the four groups of mice (from left to right, heart, liver, spleen, lung and kidney).

## REFERENCE

- [1] G.L. Feng, Y.C. Liu, Y.M. Ji, W. Zhou, X.F. Li, M. Hou, J.L. Gao, Y. Zhang, G.W. Xing, Water-soluble AIE-active fluorescent organic nanoparticles for ratiometric detection of SO<sub>2</sub> in the mitochondria of living cells, *Chem Commun (Camb)* 58(46) (2022) 6618-6621.
- [2] P. Niu, J. Liu, F. Xu, L. Yang, Y. Li, A. Sun, L. Wei, X. Liu, X. Song, Dual-Ratiometric Fluorescent Probe for H<sub>2</sub>O<sub>2</sub> and HClO in Living Cells and Zebrafish and Application in Alcoholic Liver Injury Monitoring, *ACS Appl Bio Mater* 5(4) (2022) 1683-1691.
- [3] T. Huang, S. Yan, Y. Yu, Y. Xue, Y. Yu, C. Han, Dual-Responsive Ratiometric Fluorescent Probe for Hypochlorite and Peroxynitrite Detection and Imaging In Vitro and In Vivo, *Anal Chem* 94(2) (2022) 1415-1424.
- [4] C. Jiang, Y. Li, L. Yan, A. Ye, Q. He, C. Yao, A ratiometric fluorescence mitochondrial-targeted probe for imaging HOCl in vitro and in vivo, *Dyes and Pigments* 198 (2022).
- [5] M. He, M. Ye, Z. Wang, P. Liu, H. Li, C. Lu, Y. Wang, T. Liang, H. Li, C. Li, A ratiometric near-infrared fluorescent probe with a large emission peak shift for sensing and imaging hypochlorous acid, *Sensors and Actuators B: Chemical* 343 (2021).
- [6] Q. Zhang, X. Hu, X. Dai, P. Ling, J. Sun, H. Chen, F. Gao, General Strategy to Achieve Color-Tunable Ratiometric Two-Photon Integrated Single Semiconducting Polymer Dot for Imaging Hypochlorous Acid, *ACS Nano* (2021).
- [7] Z. Zhan, L. Chai, Q. Lei, X. Zhou, Y. Wang, H. Deng, Y. Lv, W. Li, Two-photon ratiometric fluorescent probe for imaging of hypochlorous acid in acute lung injury and its remediation effect, *Anal Chim Acta* 1187 (2021) 339159.
- [8] K.H. Kim, S.J. Kim, S. Singha, Y.J. Yang, S.K. Park, K.H. Ahn, Ratiometric Detection of Hypochlorous Acid in Brain Tissues of Neuroinflammation and Maternal Immune Activation Models with a Deep-Red/Near-Infrared Emitting Probe, *ACS Sens* 6(9) (2021) 3253-3261.
- [9] X. Song, C. Li, Y. Wang, D. Wang, Z. Liu, A ratiometric two-photon fluorescence probe for monitoring mitochondrial HOCl produced during the traumatic brain injury process, *Sensors and Actuators B: Chemical* 311 (2020).
- [10] Y. Shi, F. Huo, C. Yin, Malononitrile as the 'double-edged sword' of passivation-activation regulating two ICT to highly sensitive and accurate ratiometric fluorescent detection for hypochlorous

acid in biological system, Sens Actuators B Chem 325 (2020) 128793.
